# Supplementary material for: Tunable doping and band gap of graphene on functionalized hexagonal boron nitride with hydrogen and fluorine
Source: Royal Society of Chemistry journal article supplement (doi:10.1039/c3cp44460k), 2013-01-01
Supplement: c3cp44460k.pdf [file c3cp44460k.pdf]

## Supporting Information

### **Tunable doping and band gap of graphene on functionalized hexagonal boron nitride with hydrogen and fluorine**

Shaobin Tang,<sup>\*</sup> Jianping Yu,<sup>\*</sup> and Liangxian Liu

*Key Laboratory of Organo-Pharmaceutical Chemistry of Jiangxi Province, Gannan  
Normal University, Ganzhou 341000, China*

*\* E-mail address: [tsb1980@xmu.edu.cn](mailto:tsb1980@xmu.edu.cn), [yujianping402871@sina.com](mailto:yujianping402871@sina.com)*

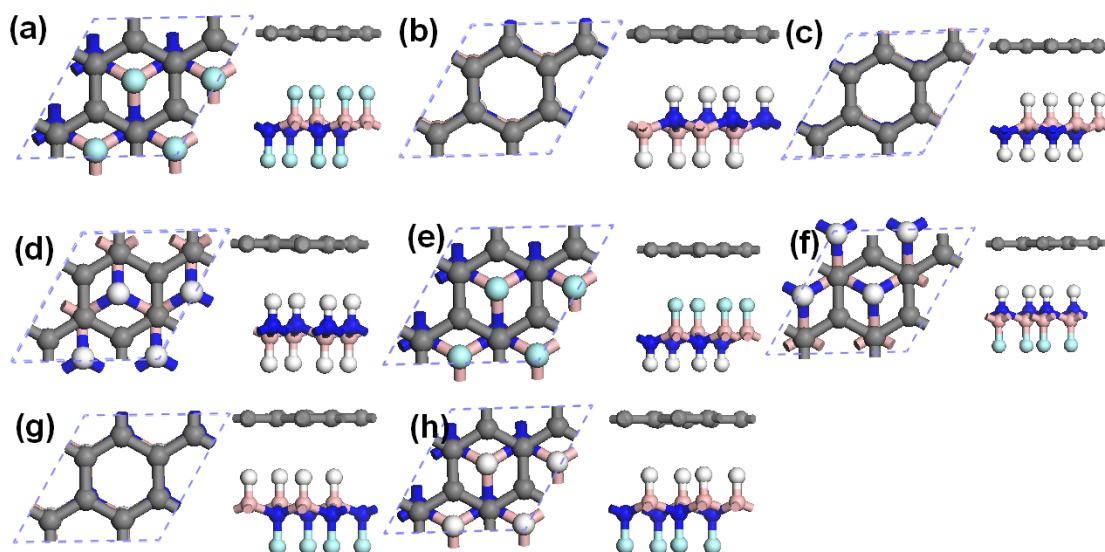

**Figure S1.** Structures (top and side view ) of graphene supported on the hydrogenated and fluorinated h-BN with different configurations. (a) G/B-FBNF, (b) G/N-HBNH, (c) G/B-HBNH, (d) G/Nh-HBNH, (e) G/Fh-FBNH, (f) G/Hh-FBNH, (g) G/H-HBNF, and (h) G/Hh-HBNF.

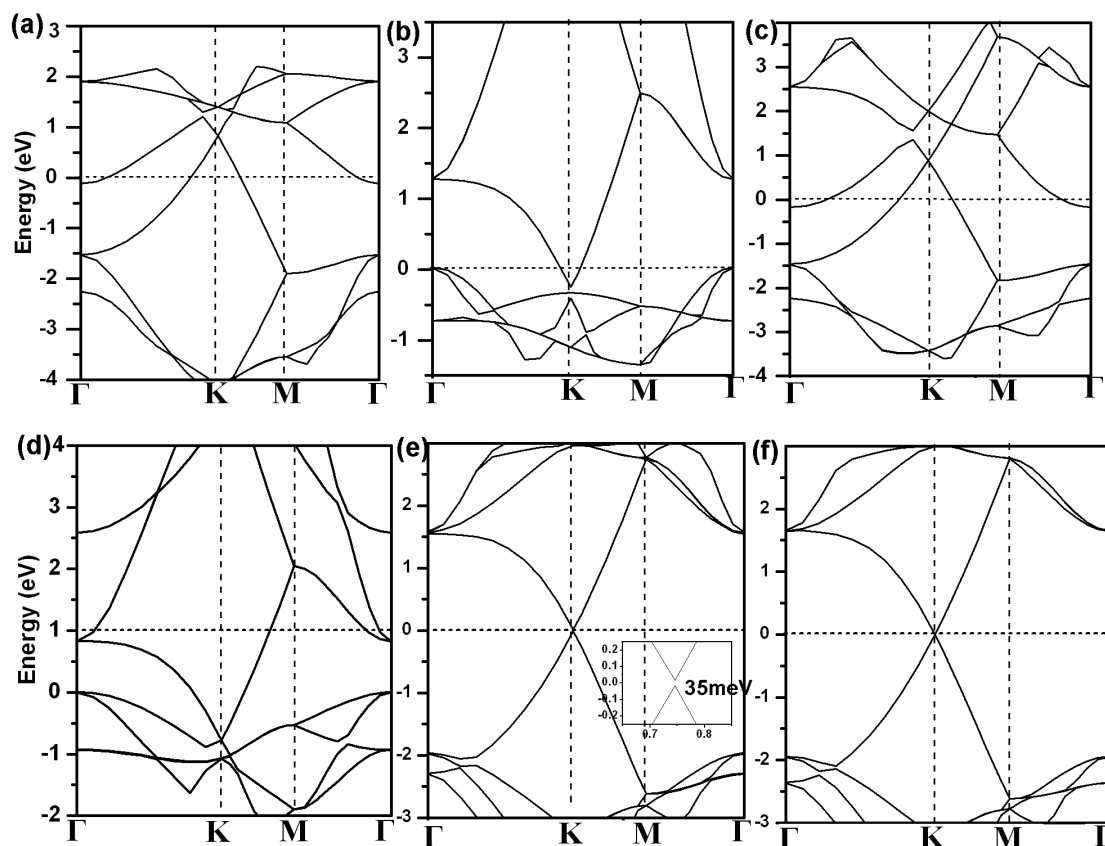

**Figure S2.** Band structures of (a) G/Bh-FBNF, (b) G/Nh-HBNH, (c) G/Fh-FBNH, (d) G/Hh-FBNH, (e) G/H-HBNF, and (f) G/Hh-HBNF. The Fermi level is set to 0.

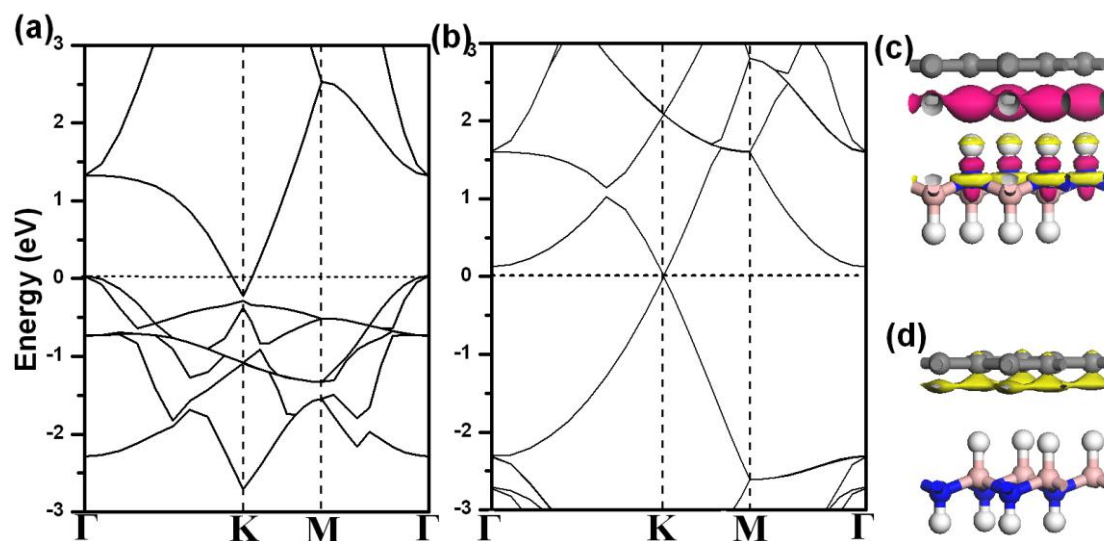

**Figure S3.** Band structures (a, b) and charge density difference (c, d) of hybrid structures G/N-HBNH and G/B-HBNH, respectively. The red and yellow areas in (c) and (d) denote electron accumulation and depletion, respectively, and isosurfaces are  $0.003 \text{ e}/\text{\AA}^3$ . The Fermi level is set to 0.

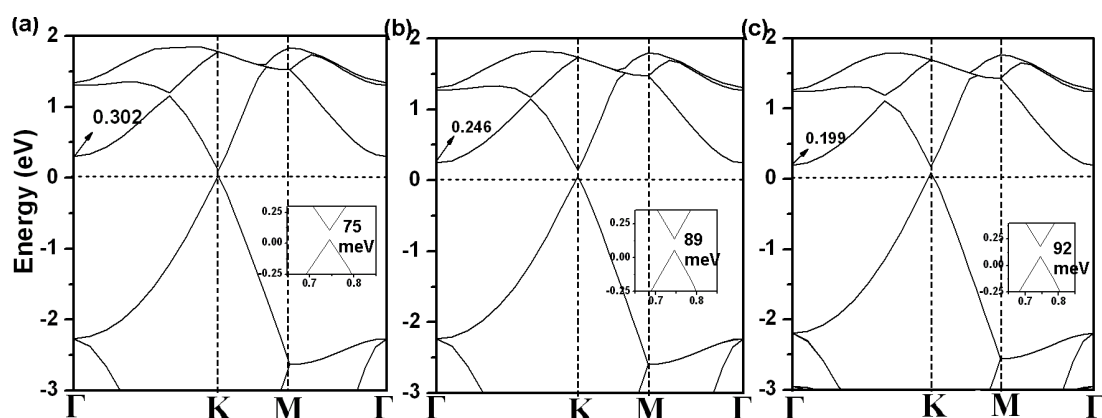

**Figure S4.** Band structures of G/F-HBNF with the electric field of (a) 0.2, (b) 0.3, and (c) 0.4  $\text{V}/\text{\AA}$ , respectively. The arrows in (a)-(c) show the energy level of the lowest unoccupied state (LUS) at  $\Gamma$  point with respect to the Fermi level. The Fermi level is set to 0.
